# Supplementary material for: Prevalence and determinants of opportunistic infections among HIV-infected adults receiving antiretroviral therapy in Ethiopia: A systematic review and meta-analysis
Source: Frontiers journal article supplement (doi:10.3389/fmed.2023.1087086), 2023-02-16
Supplement: Data_Sheet_1.pdf [file Data_Sheet_1.pdf]

Quality assessment of studies using JBI's critical appraisal tools designed for Descriptive cross-sectional study

| Study           | Sample size | JBI's critical appraisal questions |    |    |    |    |    |    |    |    | Score | Overall Appraisal |
|-----------------|-------------|------------------------------------|----|----|----|----|----|----|----|----|-------|-------------------|
|                 |             | Q1                                 | Q2 | Q3 | Q4 | Q5 | Q6 | Q7 | Q8 | Q9 |       |                   |
| Alemayehu et al | 362         | Y                                  | Y  | Y  | Y  | y  | Y  | Y  | Y  | Y  | 9     | Included          |

Y –Yes;N-No;U -Unclear-Question. Overall score is calculated by counting the number of Y's in each row.Q1=Was the sample frame appropriate to address the target population? Q2=Were study participants sampled in an appropriate way? Q3=Was the sample size adequate? Q4=Were the study subjects and the setting described in detail? Q5=Was the data analysis conducted with sufficient coverage of the identified sample? Q6=Were valid methods used for the identification of the condition? Q7=Was the condition measured in a standard, reliable way for all participants? Q8=Was there appropriate statistical analysis? Q9=Was the response rate adequate, and if not, was the low response rate managed appropriately?

Quality assessment of studies using JBI's critical appraisal tools designed for Analytical cross-sectional study

| Study             | Sample size | JBI's critical appraisal questions |    |    |    |    |    |    |    | Score | Overall Appraisal |
|-------------------|-------------|------------------------------------|----|----|----|----|----|----|----|-------|-------------------|
|                   |             | Q1                                 | Q2 | Q3 | Q4 | Q5 | Q6 | Q7 | Q8 |       |                   |
| Debasu et al.[19] | 360         | Y                                  | y  | y  | y  | y  | y  | y  | y  | 8     | Included          |
| Addisu et al.     | 315         | y                                  | y  | y  | y  | y  | y  | y  | y  | 8     | Included          |
| Wachamo et al.    | 414         | Y                                  | y  | y  | y  | y  | y  | y  | y  | 8     | Included          |
| Mitiku et al.     | 358         | Y                                  | y  | y  | y  | y  | y  | y  | y  | 8     | Included          |
| eldearegawi et al | 400         | y                                  | y  | y  | y  | y  | y  | y  | y  | 8     | Included          |
| Dereje et al.     | 386         | Y                                  | y  | y  | y  | y  | y  | y  | y  | 8     | Included          |
| Mengistu et al    | 266         | Y                                  | y  | y  | y  | y  | y  | y  | y  | 8     | Included          |
| Moges et al.      | 423         | y                                  | y  | y  | y  | y  | y  | y  | y  | 8     | Included          |
| Hailu et al.      | 394         | Y                                  | y  | y  | y  | y  | y  | y  | y  | 8     | Included          |
| Fite et al.       | 303         | Y                                  | y  | y  | y  | y  | y  | y  | y  | 8     | Included          |
| Solomon et al.    | 658         | y                                  | y  | y  | y  | y  | y  | y  | y  | 8     | Included          |
| Tiku and Tirhas   | 125         | Y                                  | y  | y  | y  | y  | y  | y  | y  | 8     | Included          |

Y –Yes;N-No;U -Unclear-Question. Overall score is calculated by counting the number of Y's in

For analytical cross-sectional study, the JBI checklist assessed the following questions Q1= were the criteria for inclusion in the sample clearly defined? Q2=were the study subjects and the=Were objective, standard criteria used for measurement of the condition? Q5=Were confounding factors identified? Q6=Were strategies to deal with confounding factors stated? Q7=Were the outcomes measured in a valid and reliable way? Q8=Was appropriate statistical analysis used?

JBI Critical Appraisal Checklist for Cohort Studies

| Study                   | Sample size | JBI's critical appraisal questions |    |    |    |    |    |    |    |    |     |     | Score | Overall Appraisal |
|-------------------------|-------------|------------------------------------|----|----|----|----|----|----|----|----|-----|-----|-------|-------------------|
|                         |             | Q1                                 | Q2 | Q3 | Q4 | Q5 | Q6 | Q7 | Q8 | Q9 | Q10 | Q11 |       |                   |
| Arefaine et <i>al</i>   | 317         | Y                                  | y  | y  | y  | y  | y  | y  | y  | y  | y   | y   | 8     | Included          |
| Direslegn et <i>al.</i> | 232         |                                    |    |    |    |    |    |    | y  | y  | y   |     |       |                   |
|                         |             | y                                  | y  | y  | y  | y  | y  | y  |    |    |     | y   | 8     | Included          |

- ✓ Q1 Were the two groups similar and recruited from the same population?
- ✓ Q2 Were the exposures measured similarly to assign people to both exposed and unexposed groups?
- ✓ Q3 Was the exposure measured in a valid and reliable way?
- ✓ Q4 Were confounding factors identified?
- ✓ Q5 Were strategies to deal with confounding factors stated?
- ✓ Q6 Were the groups/participants free of the outcome at the start of the study (or at the moment of exposure)?
- ✓ Q7 Were the outcomes measured in a valid and reliable way?
- ✓ Q8 Was the follow up time reported and sufficient to be long enough for outcomes to occur?
- ✓ Q9 Was follow up complete, and if not, were the reasons to loss to follow up described and explored?
- ✓ Q10 Were strategies to address incomplete follow up utilized?
- ✓ Q11 Was appropriate statistical analysis used?
